# Supplementary material
Source: PubMed Central journal article supplement (PMC5970038)
Supplement: NIHMS938567-supplement-1.pdf [file NIHMS938567-supplement-1.pdf]

Supplemental Fig. S1

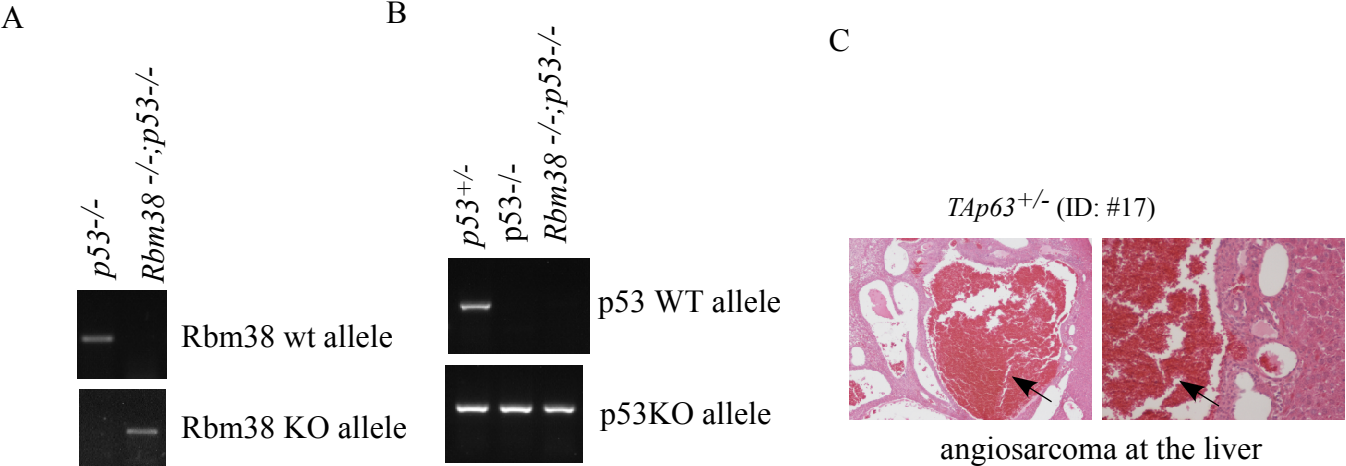

**Supplemental Fig. S1** (A-B) Confirmation of genotype of *p53*<sup>-/-</sup> and *Rbm38*<sup>-/-</sup>; *p53*<sup>-/-</sup> MEFs. (C) H.E.-stained angiosarcoma from the liver of a *TAp63*<sup>+/-</sup> mouse. Arrow indicated the tumor.

Supplemental Fig. S2

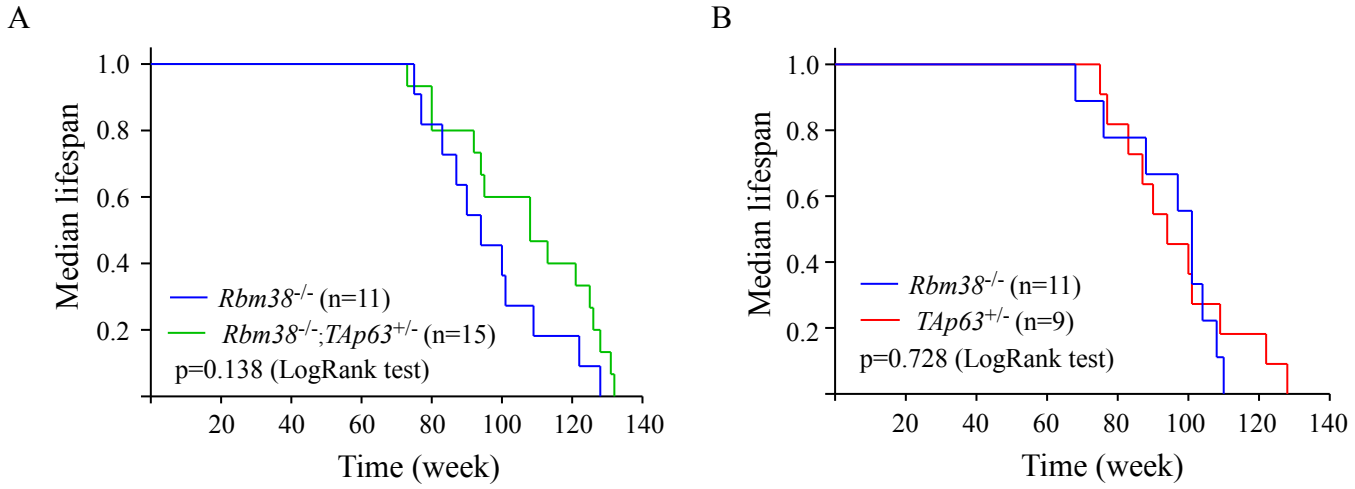

**Supplemental Fig. 2** (A) Kaplan-Meier survival curves of tumor-free *Rbm38*<sup>-/-</sup> (n=11) and *Rbm38*<sup>-/-</sup>;*TAp63*<sup>+/-</sup> (n=15) mice. The median survival time is 94 weeks for *Rbm38*<sup>-/-</sup> mice and 108 weeks for *Rbm38*<sup>-/-</sup>;*TAp63*<sup>+/-</sup> mice (p=0.138 by LogRank test). (B) Kaplan-Meier survival curves of tumor-free *Rbm38*<sup>-/-</sup> (n=11) and *TAp63*<sup>+/-</sup> (n=9) mice. The median survival time is 94 weeks for *Rbm38*<sup>-/-</sup> mice and 101 weeks for *TAp63*<sup>+/-</sup> mice (p=0.728 by LogRank test).

Supplemental Fig. S3

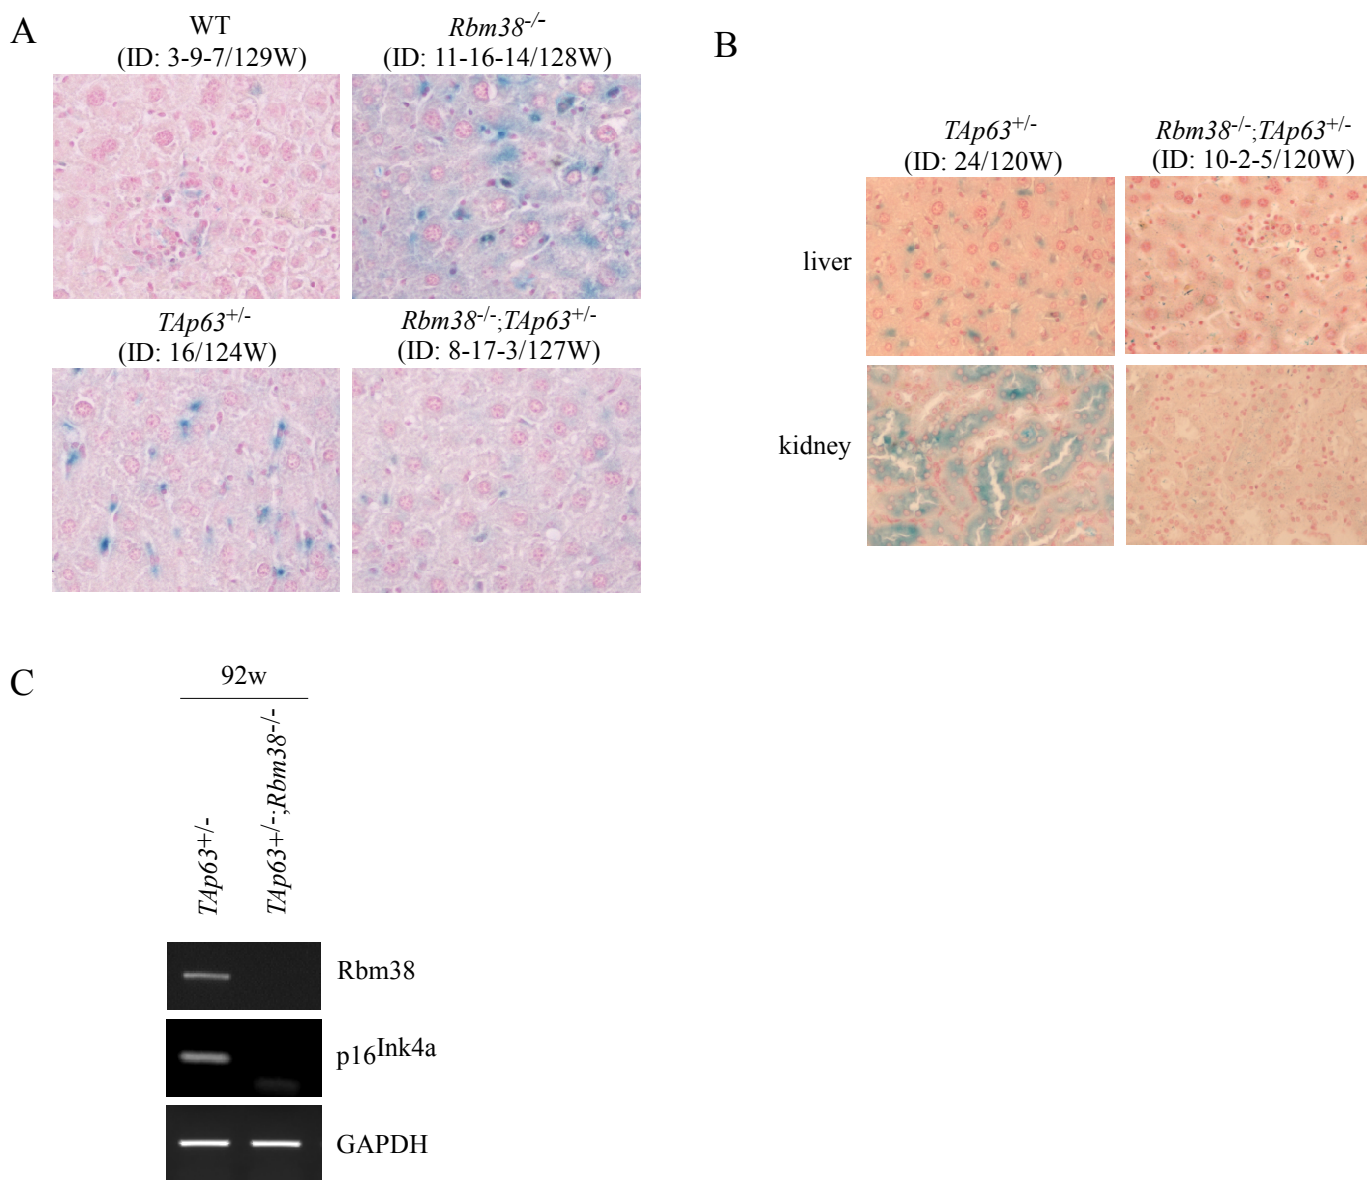

**Supplemental Fig. S3** (A) The SA-β-gal-stained liver tissues of WT (ID: 3-9-7/129W), *Rbm38*<sup>-/-</sup> (ID: 11-16-14/128W), *TAp63*<sup>+/-</sup> (ID: 16/124W), and *Rbm38*<sup>-/-</sup>;*TAp63*<sup>+/-</sup> (ID: 8-17-3/127W) were sectioned and counterstained with nuclear fast red. (B) The SA-β-gal-stained liver tissues of *TAp63*<sup>+/-</sup> (ID: 24/120W), and *Rbm38*<sup>-/-</sup>;*TAp63*<sup>+/-</sup> (ID: 10-2-5/120W) were sectioned and counterstained with nuclear fast red. (C) The level of Rbm38, p16<sup>Ink4a</sup> and GAPDH transcripts were examined in the liver tissues of *TAp63*<sup>+/-</sup> (ID: 10-2-1/92W) and *Rbm38*<sup>-/-</sup>;*TAp63*<sup>+/-</sup> (ID: 5-1-3/92W) mice.

Supplemental Table 1: Wild-type mice - survival time\*, tumor spectrum\*, liver steatosis, and other abnormalities\*

| <b>ID</b> | <b>Gender</b> | <b>Survival (Weeks)</b> | <b>Tumor</b>        | <b>Liver Steatosis</b> | <b>Other abnormalities</b>  |
|-----------|---------------|-------------------------|---------------------|------------------------|-----------------------------|
| 1-24-2    | M             | 83                      | No                  | Yes                    | N/A                         |
| 2-15-2    | F             | 140                     | Lymphoma            | No                     | EMH in liver                |
| 2-19-6    | M             | 132                     | No                  | No                     | EMH in spleen; Pancreatitis |
| 2-19-2    | F             | 143                     | No                  | No                     | EMH in spleen               |
| 3-11-3    | M             | 129                     | No                  | No                     | N/A                         |
| 3-28-5    | F             | 85                      | No                  | Yes                    | EMH in spleen               |
| 3-9-7     | M             | 129                     | No                  | No                     | N/A                         |
| 5-12-3    | F             | 99                      | Lymphoma            | No                     | EMH in spleen               |
| 7-9-9     | F             | 116                     | No                  | No                     | N/A                         |
| 8-2-6     | M             | 120                     | No                  | No                     | N/A                         |
| 10-24-7   | F             | 130                     | No                  | No                     | EMH in spleen; Pancreatitis |
| 10-26-6   | F             | 129                     | Histiocytic sarcoma | No                     | EMH in spleen and liver     |
| 11-10-7   | M             | 121                     | No                  | No                     | N/A                         |
| 11-7-3    | F             | 121                     | No                  | No                     | N/A                         |
| 11-29-2   | F             | 144                     | No                  | Yes                    | EMH in spleen               |
| 12-2-4    | F             | 113                     | No                  | No                     | N/A                         |
| 12-20-7   | F             | 115                     | No                  | No                     | EMH in spleen               |

\*Data adapted from *PNAS*, 111(52):18637-42

Supplemental Table 2: *Rbm38*<sup>-/-</sup> mice - survival time\*, tumor spectrum\*, liver steatosis, and other abnormalities\*

| <b>ID</b> | <b>Gender</b> | <b>Survival (Weeks)</b> | <b>Tumor</b>                 | <b>Liver Steatosis</b> | <b>Other abnormalities</b> |
|-----------|---------------|-------------------------|------------------------------|------------------------|----------------------------|
| 1-12-2    | M             | 100                     | Lymphoma                     | No                     | EMH in spleen              |
| 1-24-5    | M             | 83                      | No                           | Yes                    | N/A                        |
| 1-11-3    | M             | 100                     | No                           | No                     | N/A                        |
| 1-11-14   | F             | 110                     | Histiocytic sarcoma          | No                     | EMH in spleen              |
| 2-14-2    | M             | 109                     | No                           | No                     | EMH in spleen              |
| 2-14-3    | M             | 101                     | No                           | No                     | EMH in spleen              |
| 2-25-1    | F             | 107                     | Lymphoma                     | No                     | EMH in spleen              |
| 3-7-2     | F             | 101                     | Lymphoma                     | No                     | EMH in spleen              |
| 3-7-5     | M             | 129                     | Lymphoma                     | No                     | EMH in liver               |
| 3-7-4     | M             | 129                     | Hepatoma                     | No                     | EMH in spleen              |
| 6-15-3    | F             | 90                      | No                           | Yes                    | EMH in spleen and liver    |
| 8-2-3     | F             | 94                      | No                           | No                     | EMH in spleen              |
| 9-30-4    | M             | 102                     | Hemangiosarcoma              | No                     | EMH in spleen and liver    |
| 10-26-3   | F             | 75                      | No                           | No                     | EMH in spleen              |
| 11-3-14   | M             | 77                      | No                           | No                     | EMH in spleen              |
| 11-10-10  | M             | 124                     | Lymphoma and hemangiosarcoma | No                     | EMH in spleen and liver    |
| 11-16-14  | M             | 128                     | No                           | No                     | EMH in spleen and liver    |
| 11-16-7   | F             | 125                     | Hepatoma and lymphoma        | No                     | EMH in spleen              |
| 12-19-3   | M             | 123                     | Lymphoma                     | No                     | EMH in spleen              |
| 12-19-8   | M             | 118                     | Hepatoma                     | No                     | EMH in spleen and liver    |
| 12-19-6   | F             | 87                      | No                           | No                     | N/A                        |
| 12-24-2   | M             | 122                     | No                           | Yes                    | N/A                        |
| 12-28-5   | F             | 102                     | Hepatoma and lymphoma        | No                     | EMH in spleen              |

\*Data adapted from *PNAS*, 111(52):18637-42
